# Supplementary material for: Mapping the unjust global impact of harmful fisheries subsidies
Source: Research Square preprint supplement (doi:10.21203/rs.3.rs-902618/v1), 2021-09-30
Supplement: Supplementary file 2 [file 2773b8bb126d51fc8f5a10f6.docx]

**Supplementary Information**

***Table S.1: The regional distribution of the provision and impact of harmful fisheries subsidies.*** *Total amount of harmful fisheries subsidies being provided by each region, the total amount of domestic and foreign harmful fisheries subsidies estimated to be impacting each regions water, and the overall net impact, i.e. whether a region is considered an overall net subsidy-sink (>100%) or a net subsidy-source (<100%).*

| **Region** | **Harmful subsidies provided by the region (million US$)** | **Domestic harmful subsidies impacting the region (million US$)** | **Foreign harmful subsidies impacting the region (million US$)** | **Net overall impact**  **(source <100, or sink >100)**  **(%)** |
| --- | --- | --- | --- | --- |
| Africa | 1,552.93 (± 399.45) | 1,498.17 (± 378.74) | 1,245.57 (± 324.64) | 177% |
| Asia | 13,974.74 (± 4,025.04) | 11,714.00 (± 3,303.42) | 15.19 (± 2.95) | 84% |
| Europe | 3,858.39 (± 901.13) | 3,055.83 (± 692.79) | 521.11 (± 111.49) | 93% |
| North America | 1,521.22 (± 392.61) | 1,308.34 (± 326.71) | 12.68 (± 2.74) | 87% |
| Oceania | 184.57 (± 71.82) | 137.96 (± 49.27) | 269.14 (± 70.66) | 221% |
| South, Central America and Caribbean | 1,154.78 (± 393.90) | 1,027.94 (± 342.55) | 54.85 (± 15.27) | 94% |

***Table S.2: The regional distribution of the provision and impact of harmful fisheries subsidies.*** *Inter-regional exchanges of the impact of harmful fisheries subsidies, from the subsidy-providing region to the impacted region.*

| **Region providing the harmful subsidy** | **Region impacted by the harmful subsidy** | **Amount of harmful subsidy (million US$)** |
| --- | --- | --- |
| Africa | Africa | 1,498.17 (± 378.74) |
| Africa | High seas | 50.59 (± 19.61) |
| Africa | Asia | 4.15 (± 1.11) |
| Africa | Europe | 0.02 (± 0.00) |
| Asia | Asia | 11,714.00 (± 3,303.42) |
| Asia | High seas | 870.24 (± 362.94) |
| Asia | Africa | 654.66 (± 187.97) |
| Asia | Europe | 516.48 (± 110.11) |
| Asia | Oceania | 164.72 (± 46.14) |
| Asia | South, Central America and Caribbean | 48.51 (± 13.85) |
| Asia | North America | 6.13 (± 0.61) |
| Europe | Europe | 3,055.83 (± 692.79) |
| Europe | Africa | 541.14 (± 119.28) |
| Europe | High seas | 237.33 (± 83.71) |
| Europe | Asia | 10.51 (± 1.58) |
| Europe | North America | 6.55 (± 2.13) |
| Europe | South, Central America and Caribbean | 6.34 (± 1.42) |
| Europe | Oceania | 0.69 (± 0.23) |
| North America | North America | 1,308.34 (± 326.71) |
| North America | Oceania | 101.55 (± 23.63) |
| North America | High seas | 99.92 (± 37.91) |
| North America | Africa | 9.59 (± 3.84) |
| North America | Europe | 1.82 (± 0.52) |
| Oceania | Oceania | 137.96 (± 49.27) |
| Oceania | High seas | 45.89 (± 22.21) |
| Oceania | Asia | 0.54 (± 0.27) |
| Oceania | Europe | 0.18 (± 0.07) |
| Oceania | North America | 0.00 (± 0.00) |
| South, Central America and Caribbean | South, Central America and Caribbean | 1,027.94 (± 342.55) |
| South, Central America and Caribbean | High seas | 81.87 (± 36.35) |
| South, Central America and Caribbean | Africa | 40.17 (± 13.55) |
| South, Central America and Caribbean | Europe | 2.61 (± 0.79) |
| South, Central America and Caribbean | Oceania | 2.19 (± 0.66) |

***Table S.3: The provision and impact of harmful fisheries subsidies for all countries.*** *The rating of Human Development Index, beneficial subsidies, stock status and MPA coverage, as either very high, high, low or very low. The absolute amount of harmful subsidies provided in 2018 (Sumaila et al. 2019). The amount of harmful subsidies that are provided to the domestic, foreign and high seas fishing fleets, respectively. The cumulative impact of domestic and foreign harmful subsidies to a country’s EEZ. The net overall impact, the difference between the amount of harmful subsidies provided and the cumulative (domestic and foreign) amount of harmful subsidies impacting the EEZ, a net subsidy-sink country has a value over 100% while a net subsidy-source country has a value below 100%.*

| **Country** | **Human Development Index category** | **Beneficial subsidies category** | **Stock status category** | **Harmful subsidies provided**  **(million US$)** | **Harmful subsidies provided to each fleet segment (million US$)** | | | **Total harmful subsidies impact on their EEZ**  **(million US$)** | **Net overall impact**  **(source <100, or sink >100)**  **(%)** |
| --- | --- | --- | --- | --- | --- | --- | --- | --- | --- |
| **Domestic** | **Foreign** | **High seas** |
| Albania | High | Low | Low | 6.99 | 6.99 (± 3.05) | - | - | 6.99 (± 3.05) | 100 |
| Algeria | High | Low | Low | 208.42 | 208.42 (± 38.06) | - | - | 228.39 (± 42.20) | 110 |
| Angola | Low | Low | High | 43.05 | 42.80 (± 12.05) | 0.25 (± 0.02) | 0.00 (± 0.00) | 91.69 (± 28.21) | 213 |
| Antigua Barb | High | Low | Low | 1.29 | 1.29 (± 0.65) | - | - | 1.29 (± 0.65) | 100 |
| Argentina | High | High | Low | 242.83 | 242.83 (± 121.41) | - | - | 242.83 (± 121.41) | 100 |
| Australia | High | High | Low | 28.31 | 26.88 (± 9.93) | 0.55 (± 0.27) | 0.89 (± 0.44) | 31.73 (± 11.41) | 112 |
| Bahamas | High | High | High | 4.63 | 4.63 (± 1.71) | - | - | 4.66 (± 1.75) | 101 |
| Bahrain | High | High | Low | 11.25 | 8.12 (± 4.06) | 3.13 (± 1.56) | - | 8.12 (± 4.06) | 72 |
| Bangladesh | Low | High | High | 91.38 | 91.38 (± 43.59) | - | - | 95.08 (± 44.68) | 104 |
| Barbados | High | Low | Low | 2.58 | 2.42 (± 1.04) | 0.03 (± 0.01) | 0.13 (± 0.07) | 2.43 (± 1.04) | 94 |
| Belgium | High | Low | Low | 26.71 | 0.38 (± 0.08) | 26.34 (± 8.30) | - | 1.91 (± 0.45) | 7 |
| Belize | Low | High | Low | 47.09 | 0.65 (± 0.32) | 38.10 (± 13.00) | 8.35 (± 4.17) | 0.65 (± 0.32) | 1 |
| Benin | Low | Low | Low | 1.12 | 1.12 (± 0.11) | - | - | 2.03 (± 0.34) | 181 |
| Brazil | High | High | High | 256.09 | 234.38 (± 46.88) | - | 21.71 (± 7.60) | 240.23 (± 49.12) | 94 |
| Brunei Darsm | High | Low | Low | 1.08 | 1.08 (± 0.54) | - | - | 1.24 (± 0.61) | 116 |
| Bulgaria | High | Low | Low | 7.50 | 7.50 (± 3.75) | - | - | 7.88 (± 3.90) | 105 |
| Cambodia | Low | High | Low | 11.47 | 10.17 (± 5.09) | 1.30 (± 0.65) | - | 121.36 (± 49.56) | 1,058 |
| Cameroon | Low | Low | Low | 19.51 | 18.88 (± 9.44) | 0.62 (± 0.25) | - | 21.53 (± 10.37) | 110 |
| Canada | High | High | Low | 194.21 | 193.38 (± 56.18) | 0.04 (± 0.01) | 0.79 (± 0.28) | 199.93 (± 58.31) | 103 |
| Cape Verde | Low | Low | High | 19.24 | 13.55 (± 6.58) | 4.24 (± 1.49) | 1.45 (± 0.72) | 16.53 (± 7.11) | 86 |
| Chile | High | High | Low | 133.08 | 90.55 (± 27.17) | 37.39 (± 9.32) | 5.14 (± 2.06) | 99.40 (± 29.59) | 75 |
| China | High | High | High | 5,885.64 | 3,416.17 (± 840.53) | 2,400.98 (± 571.15) | 68.49 (± 23.97) | 3,528.30 (± 885.39) | 60 |
| Colombia | Low | High | High | 11.48 | 7.44 (± 3.65) | 0.06 (± 0.03) | 3.97 (± 1.99) | 7.44 (± 3.65) | 65 |
| Comoros | Low | Low | High | 55.70 | 49.67 (± 14.90) | 6.03 (± 0.90) | - | 49.68 (± 14.90) | 89 |
| Congo Dem Rep | Low | Low | Low | 0.30 | 0.30 (± 0.03) | - | - | 2.07 (± 0.65) | 686 |
| Congo Republic | Low | Low | Low | 1.50 | 1.44 (± 0.43) | 0.06 (± 0.01) | - | 10.41 (± 3.56) | 693 |
| Costa Rica | High | High | High | 3.93 | 2.87 (± 0.79) | 0.05 (± 0.02) | 1.00 (± 0.40) | 2.87 (± 0.79) | 73 |
| Cote d'Ivoire | Low | Low | High | 54.46 | 48.58 (± 4.86) | 5.63 (± 0.99) | 0.25 (± 0.07) | 65.65 (± 10.72) | 121 |
| Croatia | High | High | High | 3.88 | 3.79 (± 1.70) | 0.10 (± 0.05) | - | 3.79 (± 1.70) | 98 |
| Cuba | High | High | Low | 2.47 | 2.40 (± 1.19) | 0.07 (± 0.02) | - | 2.40 (± 1.19) | 97 |
| Cyprus | High | Low | High | 27.48 | 27.48 (± 13.74) | - | - | 27.48 (± 13.74) | 100 |
| Denmark | High | High | Low | 106.19 | 25.97 (± 5.50) | 79.77 (± 22.85) | 0.45 (± 0.16) | 78.66 (± 20.08) | 74 |
| Djibouti | Low | Low | Low | 3.17 | 0.48 (± 0.24) | 2.69 (± 1.35) | - | 9.62 (± 2.48) | 304 |
| Dominica | Low | Low | Low | 3.58 | 0.44 (± 0.09) | 3.14 (± 1.01) | - | 0.44 (± 0.09) | 12 |
| Dominican Rp | Low | High | High | 3.51 | 3.51 (± 1.76) | 0.00 (± 0.00) | - | 3.51 (± 1.76) | 100 |
| Ecuador | High | High | High | 10.32 | 4.52 (± 1.36) | - | 5.80 (± 2.32) | 13.87 (± 5.81) | 135 |
| Egypt | Low | High | High | 48.45 | 34.83 (± 17.42) | 13.62 (± 5.44) | - | 34.83 (± 17.42) | 72 |
| El Salvador | Low | Low | Low | 1.82 | 1.15 (± 0.45) | 0.54 (± 0.13) | 0.14 (± 0.07) | 1.20 (± 0.46) | 66 |
| Equatorial Guinea | Low | Low | High | 1.03 | 1.03 (± 0.23) | - | - | 4.10 (± 1.09) | 397 |
| Eritrea | Low | High | High | 10.61 | 10.61 (± 1.06) | - | - | 12.72 (± 1.57) | 120 |
| Estonia | High | High | High | 36.07 | 8.53 (± 2.31) | 17.59 (± 5.83) | 9.95 (± 3.98) | 12.80 (± 3.29) | 35 |
| Fiji | Low | High | High | 24.80 | 11.69 (± 5.40) | - | 13.11 (± 6.56) | 11.88 (± 5.43) | 48 |
| Finland | High | High | High | 12.56 | 6.88 (± 2.06) | 5.68 (± 1.69) | - | 11.88 (± 3.46) | 95 |
| France | High | High | High | 163.53 | 66.19 (± 15.13) | 64.45 (± 18.60) | 32.89 (± 11.51) | 113.26 (± 26.61) | 69 |
| Gabon | Low | High | Low | 24.25 | 24.25 (± 10.50) | - | - | 52.19 (± 16.49) | 215 |
| Gambia | Low | Low | Low | 17.59 | 17.59 (± 8.79) | - | - | 37.43 (± 13.66) | 213 |
| Georgia | High | High | Low | 2.44 | 2.24 (± 1.12) | 0.20 (± 0.08) | - | 16.33 (± 6.81) | 669 |
| Germany | High | High | Low | 70.75 | 6.71 (± 1.58) | 59.00 (± 17.85) | 5.03 (± 1.76) | 24.54 (± 6.03) | 35 |
| Ghana | Low | Low | High | 137.57 | 116.83 (± 23.37) | 9.80 (± 1.47) | 10.94 (± 3.83) | 119.05 (± 23.74) | 87 |
| Greece | High | High | Low | 144.63 | 118.60 (± 23.72) | 26.03 (± 6.66) | - | 118.72 (± 23.77) | 82 |
| Grenada | High | Low | Low | 1.78 | 1.32 (± 0.63) | 0.45 (± 0.23) | - | 1.32 (± 0.63) | 74 |
| Guatemala | Low | Low | High | 4.17 | 1.48 (± 0.74) | 1.24 (± 0.31) | 1.44 (± 0.72) | 1.48 (± 0.74) | 36 |
| Guinea | Low | Low | High | 16.52 | 13.64 (± 2.89) | 2.88 (± 0.61) | - | 167.85 (± 57.96) | 1,016 |
| Guinea-Bissau | Low | Low | Low | 0.09 | 0.09 (± 0.01) | - | - | 149.55 (± 14.43) | 164336 |
| Guyana | Low | Low | High | 5.33 | 5.29 (± 1.59) | 0.03 (± 0.01) | 0.01 (± 0.00) | 5.32 (± 1.60) | 100 |
| Haiti | Low | Low | High | 1.70 | 1.70 (± 0.17) | 0.00 (± 0.00) | - | 1.71 (± 0.17) | 101 |
| Honduras | Low | Low | High | 3.79 | 3.79 (± 1.89) | - | - | 3.79 (± 1.89) | 100 |
| Hong Kong | High | Low | Low | 112.85 | 0.72 (± 0.36) | 112.13 (± 44.85) | - | 0.72 (± 0.36) | 1 |
| Iceland | High | High | Low | 90.87 | 85.83 (± 21.74) | 5.02 (± 1.27) | 0.01 (± 0.00) | 89.40 (± 22.61) | 98 |
| India | Low | High | High | 174.40 | 172.38 (± 57.64) | 1.81 (± 0.60) | 0.21 (± 0.08) | 254.49 (± 89.79) | 146 |
| Indonesia | Low | High | High | 565.99 | 539.23 (± 158.30) | 0.69 (± 0.14) | 26.06 (± 9.12) | 895.51 (± 302.81) | 158 |
| Iran | High | High | High | 35.22 | 6.93 (± 3.46) | 1.74 (± 0.87) | 26.55 (± 13.27) | 42.19 (± 18.23) | 120 |
| Iraq | Low | Low | Low | 0.45 | 0.45 (± 0.11) | - | - | 0.45 (± 0.11) | 100 |
| Ireland | High | High | High | 68.32 | 47.73 (± 9.55) | 19.75 (± 6.36) | 0.84 (± 0.29) | 103.03 (± 20.37) | 151 |
| Israel | High | Low | Low | 0.11 | 0.11 (± 0.05) | - | - | 0.11 (± 0.05) | 100 |
| Italy | High | High | Low | 192.80 | 172.81 (± 51.84) | 19.98 (± 5.93) | 0.00 (± 0.00) | 172.94 (± 51.90) | 90 |
| Jamaica | Low | Low | Low | 21.99 | 21.99 (± 11.00) | - | - | 21.99 (± 11.00) | 100 |
| Japan | High | High | Low | 2,110.57 | 1,737.03 (± 477.41) | 237.12 (± 71.31) | 136.43 (± 54.57) | 3,047.86 (± 739.05) | 144 |
| Jordan | Low | Low | Low | 0.04 | 0.04 (± 0.02) | - | - | 0.04 (± 0.02) | 100 |
| Kenya | Low | Low | Low | 47.25 | 12.42 (± 2.48) | 34.83 (± 12.19) | - | 13.12 (± 2.66) | 28 |
| Kiribati | Low | High | High | 17.42 | 6.74 (± 2.05) | 7.17 (± 2.85) | 3.51 (± 1.75) | 140.09 (± 30.35) | 804 |
| Korea D P Rp | Low | Low | Low | 0.98 | - | 0.40 (± 0.14) | 0.58 (± 0.29) | - | 0 |
| Korea Rep | High | High | High | 1,499.59 | 800.70 (± 160.14) | 420.23 (± 99.20) | 278.66 (± 97.53) | 1,320.18 (± 341.96) | 88 |
| Kuwait | High | Low | Low | 2.55 | 2.55 (± 1.28) | - | - | 2.55 (± 1.28) | 100 |
| Latvia | High | Low | Low | 29.64 | 3.58 (± 1.07) | 19.41 (± 5.23) | 6.64 (± 2.66) | 12.79 (± 3.68) | 43 |
| Lebanon | High | Low | Low | 0.37 | 0.37 (± 0.18) | - | - | 0.37 (± 0.18) | 100 |
| Liberia | Low | Low | High | 3.43 | 3.43 (± 1.71) | 0.00 (± 0.00) | 0.00 (± 0.00) | 20.06 (± 3.23) | 585 |
| Lithuania | High | Low | Low | 17.54 | 0.82 (± 0.16) | 15.55 (± 3.76) | 1.18 (± 0.41) | 3.94 (± 0.83) | 22 |
| Madagascar | Low | High | High | 32.90 | 32.47 (± 6.49) | 0.26 (± 0.05) | 0.18 (± 0.06) | 32.73 (± 6.53) | 99 |
| Malaysia | High | High | High | 472.02 | 463.29 (± 138.99) | 6.66 (± 2.67) | 2.06 (± 0.82) | 607.54 (± 182.27) | 129 |
| Maldives | Low | High | High | 28.68 | 24.26 (± 10.14) | - | 4.42 (± 2.21) | 24.26 (± 10.14) | 85 |
| Malta | High | Low | High | 14.31 | 2.34 (± 0.83) | 11.97 (± 5.98) | - | 3.00 (± 1.00) | 21 |
| Marshall Is | Low | High | High | 6.82 | 0.90 (± 0.45) | 4.54 (± 1.48) | 1.38 (± 0.69) | 19.33 (± 7.98) | 283 |
| Mauritania | Low | Low | High | 28.89 | 25.04 (± 6.69) | 2.05 (± 0.56) | 1.80 (± 0.72) | 145.53 (± 35.79) | 504 |
| Mauritius | High | Low | Low | 3.22 | 1.32 (± 0.30) | - | 1.90 (± 0.66) | 1.48 (± 0.33) | 46 |
| Mexico | High | High | High | 190.78 | 168.95 (± 23.06) | 1.64 (± 0.49) | 20.19 (± 6.06) | 168.95 (± 23.06) | 89 |
| Micronesia | Low | Low | Low | 8.72 | 1.09 (± 0.33) | 5.56 (± 1.23) | 2.07 (± 0.83) | 22.33 (± 9.13) | 256 |
| Montenegro | High | Low | Low | 0.10 | 0.10 (± 0.03) | - | - | 0.10 (± 0.03) | 101 |
| Morocco | Low | High | High | 208.44 | 207.90 (± 51.86) | 0.52 (± 0.05) | 0.01 (± 0.01) | 635.65 (± 160.70) | 305 |
| Mozambique | Low | High | High | 23.81 | 23.30 (± 6.99) | - | 0.51 (± 0.21) | 23.40 (± 7.02) | 98 |
| Myanmar | Low | High | High | 107.55 | 107.55 (± 32.26) | - | - | 183.43 (± 55.03) | 171 |
| Namibia | Low | High | High | 50.43 | 49.98 (± 17.49) | - | 0.45 (± 0.22) | 142.52 (± 35.61) | 283 |
| Nauru | Low | High | Low | 0.19 | 0.06 (± 0.03) | 0.07 (± 0.03) | 0.06 (± 0.03) | 18.96 (± 3.11) | 10,235 |
| Netherlands | High | High | High | 141.50 | 28.37 (± 7.10) | 111.64 (± 38.47) | 1.50 (± 0.60) | 42.07 (± 9.92) | 30 |
| New Zealand | High | High | High | 28.95 | 27.63 (± 11.05) | 0.15 (± 0.06) | 1.18 (± 0.59) | 55.33 (± 17.76) | 191 |
| Nicaragua | Low | Low | High | 20.14 | 18.69 (± 9.34) | 0.05 (± 0.02) | 1.40 (± 0.70) | 18.69 (± 9.34) | 93 |
| Nigeria | Low | Low | High | 37.40 | 36.59 (± 7.58) | 0.81 (± 0.20) | - | 37.89 (± 7.84) | 101 |
| Norway | High | High | High | 527.24 | 366.88 (± 99.36) | 92.05 (± 24.46) | 68.31 (± 27.32) | 585.47 (± 137.84) | 111 |
| Oman | High | High | High | 84.57 | 63.32 (± 28.88) | - | 21.25 (± 10.63) | 63.32 (± 28.88) | 75 |
| Pakistan | Low | High | Low | 137.89 | 136.09 (± 58.34) | 1.80 (± 0.90) | - | 136.65 (± 58.56) | 99 |
| Palau | High | High | Low | 0.58 | 0.58 (± 0.29) | - | - | 28.44 (± 9.38) | 4,887 |
| Panama | High | High | Low | 20.48 | 7.02 (± 3.02) | 0.36 (± 0.14) | 13.10 (± 6.55) | 7.02 (± 3.02) | 34 |
| Papua New Guinea | Low | Low | Low | 27.74 | 5.91 (± 1.77) | 16.57 (± 3.75) | 5.25 (± 2.10) | 47.11 (± 14.83) | 170 |
| Peru | Low | High | High | 279.79 | 279.73 (± 74.54) | - | 0.05 (± 0.02) | 345.47 (± 89.52) | 123 |
| Philippines | Low | High | High | 139.59 | 119.13 (± 46.88) | 7.12 (± 2.85) | 13.34 (± 5.34) | 119.13 (± 46.88) | 85 |
| Poland | High | High | Low | 56.92 | 17.66 (± 6.85) | 39.26 (± 11.92) | - | 24.34 (± 9.14) | 43 |
| Portugal | High | High | Low | 95.87 | 55.68 (± 11.14) | 17.32 (± 5.17) | 22.87 (± 8.00) | 59.59 (± 12.31) | 62 |
| Qatar | High | High | Low | 5.67 | 5.67 (± 2.84) | - | - | 5.67 (± 2.84) | 100 |
| Romania | High | Low | Low | 5.97 | 5.97 (± 1.50) | - | - | 6.35 (± 1.55) | 106 |
| Russian Fed. | High | High | Low | 1,162.01 | 861.81 (± 136.62) | 290.96 (± 54.28) | 9.24 (± 2.77) | 1,292.24 (± 225.06) | 111 |
| Samoa | Low | Low | High | 2.79 | 0.62 (± 0.28) | 0.00 (± 0.00) | 2.17 (± 1.08) | 3.03 (± 0.61) | 109 |
| Sao Tome Prn | Low | Low | High | 1.43 | 1.15 (± 0.23) | 0.28 (± 0.07) | - | 2.89 (± 0.83) | 202 |
| Saudi Arabia | High | High | High | 17.72 | 11.38 (± 4.55) | 6.34 (± 3.17) | - | 11.38 (± 4.55) | 64 |
| Senegal | Low | High | High | 250.25 | 122.60 (± 24.52) | 124.99 (± 22.81) | 2.67 (± 0.93) | 147.06 (± 29.03) | 59 |
| Seychelles | High | High | High | 30.17 | 0.13 (± 0.04) | - | 30.04 (± 12.02) | 8.23 (± 2.62) | 27 |
| Sierra Leone | Low | Low | High | 8.72 | 4.28 (± 0.86) | 4.44 (± 1.55) | - | 134.96 (± 24.54) | 1,547 |
| Singapore | High | Low | Low | 0.06 | - | 0.06 (± 0.02) | - | - | 0 |
| Slovenia | High | Low | Low | 1.66 | 1.66 (± 0.50) | - | - | 1.66 (± 0.50) | 100 |
| Solomon Is | Low | High | High | 24.09 | 4.88 (± 2.44) | 15.35 (± 5.18) | 3.86 (± 1.93) | 17.65 (± 7.64) | 73 |
| Somalia | Low | Low | Low | 0.42 | - | 0.42 (± 0.06) | - | 142.22 (± 63.46) | 33,533 |
| South Africa | Low | High | High | 70.25 | 69.77 (± 14.01) | 0.27 (± 0.07) | 0.21 (± 0.08) | 72.22 (± 14.75) | 103 |
| Spain | High | High | High | 682.83 | 201.56 (± 33.33) | 406.86 (± 75.06) | 74.42 (± 22.32) | 209.59 (± 36.14) | 31 |
| Sri Lanka | High | Low | High | 101.28 | 80.71 (± 21.69) | 18.17 (± 6.36) | 2.41 (± 0.84) | 82.18 (± 22.21) | 81 |
| St Kitts Nev | High | Low | Low | 0.50 | 0.50 (± 0.25) | - | - | 0.50 (± 0.25) | 100 |
| St Lucia | Low | Low | Low | 1.47 | 1.08 (± 0.54) | 0.39 (± 0.10) | - | 1.13 (± 0.56) | 77 |
| St Vincent | Low | Low | Low | 1.09 | 0.27 (± 0.13) | 0.01 (± 0.00) | 0.81 (± 0.40) | 0.72 (± 0.36) | 66 |
| Sudan | Low | Low | High | 1.40 | 0.05 (± 0.01) | 1.36 (± 0.45) | - | 0.05 (± 0.01) | 3 |
| Suriname | Low | Low | High | 5.55 | 5.55 (± 2.77) | - | - | 8.57 (± 3.83) | 154 |
| Sweden | High | High | Low | 43.98 | 34.51 (± 8.32) | 9.47 (± 2.39) | - | 56.75 (± 14.67) | 129 |
| Taiwan | High | High | High | 708.42 | 279.91 (± 116.65) | 144.94 (± 50.70) | 283.57 (± 141.78) | 279.91 (± 116.65) | 40 |
| Tanzania | Low | Low | High | 3.44 | 2.57 (± 0.77) | 0.70 (± 0.17) | 0.18 (± 0.07) | 2.57 (± 0.77) | 75 |
| Thailand | High | High | Low | 1,068.85 | 389.25 (± 116.77) | 677.02 (± 248.46) | 2.58 (± 1.03) | 389.25 (± 116.77) | 36 |
| Togo | Low | Low | Low | 1.78 | 1.63 (± 0.81) | 0.15 (± 0.05) | - | 13.52 (± 3.73) | 759 |
| Tonga | Low | Low | High | 1.41 | 0.49 (± 0.21) | - | 0.92 (± 0.46) | 0.54 (± 0.23) | 38 |
| Trinidad Tob | High | Low | High | 13.61 | 11.64 (± 3.49) | 0.71 (± 0.21) | 1.26 (± 0.50) | 14.94 (± 5.14) | 110 |
| Tunisia | Low | Low | High | 86.70 | 86.70 (± 35.19) | - | - | 91.42 (± 36.62) | 105 |
| Turkey | High | High | Low | 85.96 | 75.46 (± 22.64) | 10.50 (± 4.10) | - | 75.85 (± 22.79) | 88 |
| Tuvalu | Low | Low | Low | 0.40 | 0.02 (± 0.01) | 0.27 (± 0.09) | 0.10 (± 0.50) | 9.73 (± 1.65) | 2463 |
| Ukraine | High | Low | High | 60.61 | 47.63 (± 23.82) | 9.63 (± 4.54) | 3.35 (± 1.68) | 48.01 (± 23.97) | 79 |
| United Kingdom | High | High | High | 84.99 | 75.77 (± 15.18) | 8.56 (± 1.78) | 0.66 (± 0.23) | 468.93 (± 133.61) | 552 |
| Untd Arab Em | High | High | High | 4.86 | - | 4.86 (± 2.43) | - | - | 0 |
| Uruguay | High | High | High | 4.94 | 4.94 (± 2.44) | 0.00 (± 0.00) | 0.00 (± 0.00) | 4.94 (± 2.44) | 100 |
| USA | High | High | High | 1,136.23 | 945.98 (± 247.46) | 111.32 (± 27.50) | 78.93 (± 31.57) | 952.15 (± 248.08) | 84 |
| Vanuatu | Low | Low | High | 12.35 | 0.91 (± 0.42) | 0.04 (± 0.01) | 11.40 (± 5.70) | 0.97 (± 0.43) | 8 |
| Venezuela | High | High | Low | 43.75 | 19.18 (± 9.05) | 7.02 (± 2.88) | 17.56 (± 8.78) | 19.89 (± 9.26) | 45 |
| Viet Nam | Low | High | High | 337.85 | 334.22 (± 115.34) | 0.02 (± 0.01) | 3.62 (± 1.45) | 343.13 (± 118.65) | 102 |
| Yemen | Low | High | Low | 142.37 | 57.68 (± 27.32) | 84.69 (± 40.16) | - | 61.44 (± 28.27) | 43 |
